# Supplementary material for: Computational design of enhanced detoxification activity of a zearalenone lactonase from Clonostachys rosea in acidic medium
Source: Royal Society of Chemistry journal article supplement (doi:10.1039/c9ra04964a), 2019-01-01

# Supplementary Data

## **Computational design of enhanced detoxification activity of a zearalenone lactonase from *Clonostachys rosea* in acidic medium**

Min Lin<sup>1</sup>, Jian Tan<sup>2,4,5</sup>, Zhaobin Xu<sup>1</sup>, Jin Huang<sup>2,4,5</sup>, Ye Tian<sup>1</sup>, Bo Chen<sup>2,4,5</sup>, Yandong  
Wu<sup>6</sup>, Yi Tong<sup>6,\*</sup>, Yushan Zhu<sup>1,3,\*</sup>

<sup>1</sup> Department of Chemical Engineering, Tsinghua University, Beijing 100084, China

<sup>2</sup> Nutrition & Health Research Institute, China National Cereals, Oils and Foodstuffs Corporation (COFCO), Beijing 102209, China

<sup>3</sup> MOE Key Lab of Industrial Biocatalysis, Tsinghua University, Beijing 100084, China

<sup>4</sup> Beijing Key Lab of Nutrition, Health and Food Safety, Beijing 102209, China

<sup>5</sup> Beijing Livestock Products Quality and Safety Source Control Engineering Technology Research Center, Beijing 102209, China

<sup>6</sup> National Engineering Research Center of Corn Deep Processing, Jilin Changchun 130033, China

\* Corresponding authors: yszhu@tsinghua.edu.cn (Yushan Zhu), tongyi@cofco.com (Yi Tong).

**Table S1** Scheme for surface charge redesign in scaffold 3WZL

| Scaffold | Catalytic residues | Design positions                                                                                                                                                                                                                                                                              |                                                                                                                                                                                                                                                                                                                                                                                                                                                      | Substrate |
|----------|--------------------|-----------------------------------------------------------------------------------------------------------------------------------------------------------------------------------------------------------------------------------------------------------------------------------------------|------------------------------------------------------------------------------------------------------------------------------------------------------------------------------------------------------------------------------------------------------------------------------------------------------------------------------------------------------------------------------------------------------------------------------------------------------|-----------|
|          |                    | Sequence selection residues                                                                                                                                                                                                                                                                   | Conformation optimization residues                                                                                                                                                                                                                                                                                                                                                                                                                   |           |
| 3WZL     | S102, H242, E126   | E18, E20, D25, D31, E35, Q37, D40, S41, D57, E70, T76, D89, D92, D117, L131, D133, S136, E142, D143, E144, E145, S147, I149, A151, N152, L155, N156, D157, S162, E163, Q166, D170, E171, T190, A195, D199, E201, D209, A214, T218, E219, F222, D223, I225, I235, L237, D250, V251, Y255, E258 | Y16, L33, M38, S62, R63, K79, Y83, C101, S103, H125, T129, K130, L132, H134, L135, N137, L150, V153, M154, V158, M168, V172, R175, L176, H177, N179, Y180, W183, R185, Y187, R189, I191, T216, S220, F221, N224, F243, Y245, R2, R4, L33, Q37, S44, Q45, R52, I93, K94, C101, R118, N121, M123, H125, L132, H134, L135, L150, V153, M154, V158, Q166, R175, Y180, Y187, I191, R204, S220, F221, N234, F243, Y245, K254, Y255, T259, Q261, K262, H263 | ZEN       |

**Table S2** Scheme for charge redesign at active site in scaffold 3WZL

| Scaffold | Catalytic residues | Design positions                                    |                                                                                                                                                                              | Substrate |
|----------|--------------------|-----------------------------------------------------|------------------------------------------------------------------------------------------------------------------------------------------------------------------------------|-----------|
|          |                    | Sequence selection residues                         | Conformation optimization residues                                                                                                                                           |           |
| 3WZL     | S102, H242, E126   | D31, C101, V153,<br>M154, V158, F221,<br>M241, F243 | L28, L33, M38, F39, L80, W99, S103,<br>S106, H125, L132, H134, L135, T138,<br>L150, W165, M168, L176, Y180,<br>W183, Y187, I191, V212, T216, S220,<br>N224, L238, Y245, V246 | ZEN       |

**Table S3** Catalytic geometrical constraints for design

| Site pair                | Type     | Atom1 <sup>[a]</sup> | Atom2 <sup>[a]</sup> | Atom3 <sup>[a]</sup> | Atom4 <sup>[a]</sup> | Min <sup>[b]</sup> | Max <sup>[b]</sup> |
|--------------------------|----------|----------------------|----------------------|----------------------|----------------------|--------------------|--------------------|
| G32-ZEN                  | DISTANCE | #O12                 | N                    |                      |                      | 2.6                | 3.2                |
|                          | ANGLE    | #O12                 | HN                   | N                    |                      | 140.0              | 180.0              |
|                          | ANGLE    | #C12                 | #O12                 | HN                   |                      | 80.0               | 140.0              |
| S103-ZEN                 | DISTANCE | #O12                 | N                    |                      |                      | 2.6                | 3.2                |
|                          | ANGLE    | #O12                 | HN                   | N                    |                      | 140.0              | 180.0              |
|                          | ANGLE    | #C12                 | #O12                 | HN                   |                      | 80.0               | 140.0              |
| H242-S102                | DISTANCE | NE2                  | #OG                  |                      |                      | 2.6                | 3.2                |
|                          | ANGLE    | NE2                  | #HG1                 | #OG                  |                      | 140.0              | 180.0              |
|                          | ANGLE    | CE1                  | NE2                  | #HG1                 |                      | 90.0               | 150.0              |
| E126-H242 <sup>[c]</sup> | DISTANCE | OE1                  | #ND1                 |                      |                      | 2.6                | 3.2                |
|                          | ANGLE    | CD                   | OE1                  | #ND1                 |                      | 90.0               | 150.0              |
|                          | ANGLE    | OE1                  | #HD1                 | #ND1                 |                      | 140.0              | 180.0              |
| E126-H242 <sup>[c]</sup> | DISTANCE | OE2                  | #ND1                 |                      |                      | 2.6                | 3.2                |
|                          | ANGLE    | CD                   | OE2                  | #HD1                 |                      | 90.0               | 150.0              |
|                          | ANGLE    | OE2                  | #HD1                 | #ND1                 |                      | 140.0              | 180.0              |
| G213-E126 <sup>[d]</sup> | DISTANCE | N                    | #OE1                 |                      |                      | 2.6                | 3.2                |
|                          | ANGLE    | N                    | HN                   | #OE1                 |                      | 140.0              | 180.0              |
|                          | ANGLE    | HN                   | #OE1                 | #CD                  |                      | 90.0               | 150.0              |
| G213-E126 <sup>[d]</sup> | DISTANCE | N                    | #OE2                 |                      |                      | 2.6                | 3.2                |
|                          | ANGLE    | N                    | HN                   | #OE2                 |                      | 140.0              | 180.0              |
|                          | ANGLE    | HN                   | #OE2                 | #CD                  |                      | 90.0               | 150.0              |
| T216-E126 <sup>[e]</sup> | DISTANCE | OG1                  | #OE1                 |                      |                      | 2.6                | 3.2                |
|                          | ANGLE    | OG1                  | HG1                  | #OE1                 |                      | 140.0              | 180.0              |
|                          | ANGLE    | HG1                  | #OE1                 | #CD                  |                      | 90.0               | 150.0              |
| T216-E126 <sup>[e]</sup> | DISTANCE | OG1                  | #OE2                 |                      |                      | 2.6                | 3.2                |
|                          | ANGLE    | OG1                  | HG1                  | #OE2                 |                      | 140.0              | 180.0              |
|                          | ANGLE    | HG1                  | #OE2                 | #CD                  |                      | 90.0               | 150.0              |
| W183-ZEN                 | DISTANCE | NE1                  | #O2                  |                      |                      | 2.6                | 3.2                |
|                          | ANGLE    | #O2                  | HE1                  | NE1                  |                      | 130.0              | 180.0              |
|                          | ANGLE    | #C2                  | #O2                  | HE1                  |                      | 90.0               | 150.0              |
| ZEN-ZEN                  | DISTANCE | C7P                  | #C8P                 |                      |                      | 1.5                | 1.6                |
|                          | ANGLE    | C6P                  | C7P                  | #C8P                 |                      | 105.0              | 115.0              |
|                          | ANGLE    | C7P                  | #C8P                 | #C9P                 |                      | 105.0              | 115.0              |

[a] Atoms on the latter residue within a site pair are prefixed with '#'.

[b] Distance measurements are given in Å. Angle and torsion measurements are given in degrees.

[c] Either site pair of E126-H242 is needed.

[d] Either site pair of G213-E126 is needed.

[e] Either site pair of T216-E126 is needed.

**Table S4** Variation rules for generating transition state rotamers of ZEN

| Type     | Atom1 <sup>[a]</sup> | Atom2 <sup>[a]</sup> | Atom3 <sup>[a]</sup> | Atom4 | Min <sup>[b]</sup> | Max <sup>[b]</sup> | Step <sup>[b]</sup> |
|----------|----------------------|----------------------|----------------------|-------|--------------------|--------------------|---------------------|
| Distance | #OG                  | C12                  |                      |       | 1.4                | 1.6                | 0.1                 |
| Angle    | #CB                  | #OG                  | C12                  |       | 105.0              | 115.0              | 5.0                 |
| Torsion  | #CA                  | #CB                  | #OG                  | C12   | -180.0             | 179.0              | 10.0                |
| Distance | C12                  | O12                  |                      |       | 1.3                | 1.3                | 0.0                 |
| Angle    | #OG                  | C12                  | O12                  |       | 105.0              | 115.0              | 5.0                 |
| Torsion  | #CB                  | #OG                  | C12                  | O12   | -180.0             | 179.0              | 10.0                |
| Distance | C12                  | O10                  |                      |       | 1.408              | 1.408              | 0.0                 |
| Angle    | O12                  | C12                  | O10                  |       | 109.5              | 109.5              | 0.0                 |
| Torsion  | #OG                  | O12                  | C12                  | O10   | 120.0              | 120.0              | 10.0                |
| Distance | C12                  | C1                   |                      |       | 1.500              | 1.500              | 0.0                 |
| Angle    | O12                  | C12                  | C1                   |       | 109.5              | 109.5              | 0.0                 |
| Torsion  | #OG                  | O12                  | C12                  | C1    | -120.0             | -120.0             | 10.0                |
| Distance | C1                   | C2                   |                      |       | 1.383              | 1.383              | 0.0                 |
| Angle    | C12                  | C1                   | C2                   |       | 117.314            | 117.314            | 0.0                 |
| Torsion  | O12                  | C12                  | C1                   | C2    | -86.0              | 34.0               | 10.0                |
| Distance | O10                  | C10                  |                      |       | 1.449              | 1.449              | 0.0                 |
| Angle    | C12                  | O10                  | C10                  |       | 120.717            | 120.717            | 0.0                 |
| Torsion  | O12                  | C12                  | O10                  | C10   | -35.0              | 85.0               | 10.0                |
| Distance | C10                  | C9P                  |                      |       | 1.498              | 1.498              | 0.0                 |
| Angle    | O10                  | C10                  | C9P                  |       | 107.777            | 107.777            | 0.0                 |
| Torsion  | C12                  | O10                  | C10                  | C9P   | 120.0              | 180.0              | 10.0                |
| Distance | C9P                  | C8P                  |                      |       | 1.505              | 1.505              | 0.0                 |
| Angle    | C10                  | C9P                  | C8P                  |       | 110.205            | 110.205            | 0.0                 |
| Torsion  | O10                  | C10                  | C9P                  | C8P   | 30.0               | 90.0               | 10.0                |
| Distance | C3P                  | C4P                  |                      |       | 1.511              | 1.511              | 0.0                 |
| Angle    | C2P                  | C3P                  | C4P                  |       | 114.038            | 114.038            | 0.0                 |
| Torsion  | C1P                  | C2P                  | C3P                  | C4P   | 60.0               | 120.0              | 10.0                |
| Distance | C4P                  | C5P                  |                      |       | 1.533              | 1.533              | 0.0                 |
| Angle    | C3P                  | C4P                  | C5P                  |       | 106.995            | 106.995            | 0.0                 |
| Torsion  | C2P                  | C3P                  | C4P                  | C5P   | -130.0             | -70.0              | 10.0                |
| Distance | C5P                  | C6P                  |                      |       | 1.509              | 1.509              | 0.0                 |
| Angle    | C4P                  | C5P                  | C6P                  |       | 101.525            | 101.525            | 0.0                 |
| Torsion  | C3P                  | C4P                  | C5P                  | C6P   | 100.0              | 160.0              | 10.0                |
| Distance | C6P                  | C7P                  |                      |       | 1.513              | 1.513              | 0.0                 |
| Angle    | C5P                  | C6P                  | C7P                  |       | 126.282            | 126.282            | 0.0                 |
| Torsion  | C4P                  | C5P                  | C6P                  | C7P   | -165.0             | -105.0             | 10.0                |

[a] Atoms on anchor residue S102 are prefixed with '#'.

[b] Distance measurements are given in Å. Angle and torsion measurements are given in degrees.

**Table S5** Predicted pK<sub>a</sub> drops and calculated free energy changes for surface charge redesign in scaffold 3WZL

| Index | Mutation | pK <sub>a</sub> drop of H242 | PRODA $\Delta\Delta G^{\text{bind}}$ (kcal/mol) | PRODA $\Delta\Delta G^{\text{fold}}$ (kcal/mol) |
|-------|----------|------------------------------|-------------------------------------------------|-------------------------------------------------|
| 1     | D31K     | 0.221                        | -0.79                                           | 21.09                                           |
| 2     | D223K    | 0.102                        | -0.42                                           | 9.06                                            |
| 3     | E219K    | 0.095                        | -0.44                                           | 0.90                                            |
| 4     | D157K    | 0.079                        | -0.42                                           | -5.75                                           |
| 5     | E35K     | 0.071                        | -0.57                                           | 21.30                                           |
| 6     | D57K     | 0.068                        | -0.45                                           | 5.96                                            |
| 7     | A195K    | 0.065                        | -0.23                                           | 24.01                                           |
| 8     | E145K    | 0.061                        | -0.39                                           | -3.66                                           |
| 9     | F222K    | 0.054                        | -0.23                                           | -23.83                                          |
| 10    | L155K    | 0.052                        | -0.19                                           | -4.30                                           |
| 11    | N152K    | 0.045                        | -0.22                                           | -1.84                                           |
| 12    | D133K    | 0.044                        | -0.40                                           | -2.17                                           |
| 13    | E171K    | 0.037                        | -0.36                                           | -3.01                                           |
| 14    | D209K    | 0.034                        | -0.35                                           | -3.93                                           |
| 15    | I149K    | 0.033                        | -0.38                                           | -4.20                                           |
| 16    | E18K     | 0.032                        | -0.40                                           | 2.04                                            |
| 17    | L237K    | 0.025                        | -0.21                                           | -2.91                                           |
| 18    | T218K    | 0.024                        | -0.27                                           | -6.04                                           |
| 19    | A214K    | 0.022                        | -0.17                                           | -2.56                                           |
| 20    | E163K    | 0.021                        | -0.34                                           | 5.24                                            |
| 21    | Q166K    | 0.021                        | -0.19                                           | 0.81                                            |
| 22    | L131K    | 0.020                        | -0.24                                           | -6.39                                           |
| 23    | S162K    | 0.019                        | -0.20                                           | 0.30                                            |
| 24    | I225K    | 0.019                        | -0.22                                           | -1.89                                           |
| 25    | D250K    | 0.018                        | -0.29                                           | -0.30                                           |
| 26    | D143K    | 0.018                        | -0.36                                           | 2.99                                            |
| 27    | S136K    | 0.018                        | -0.27                                           | -7.23                                           |
| 28    | D40K     | 0.017                        | -0.35                                           | 3.20                                            |
| 29    | I235K    | 0.016                        | -0.21                                           | 1.11                                            |
| 30    | E258K    | 0.016                        | -0.34                                           | -0.90                                           |
| 31    | D170K    | 0.014                        | -0.30                                           | -0.35                                           |
| 32    | E70K     | 0.014                        | -0.41                                           | 1.72                                            |
| 33    | T76K     | 0.014                        | -0.33                                           | 3.87                                            |
| 34    | T190K    | 0.013                        | -0.34                                           | -0.06                                           |
| 35    | Y255K    | 0.012                        | -0.22                                           | -2.02                                           |
| 36    | D199K    | 0.011                        | -0.30                                           | -2.98                                           |
| 37    | E144K    | 0.009                        | -0.35                                           | -2.67                                           |
| 38    | V251K    | 0.009                        | -0.18                                           | -3.40                                           |
| 39    | E142K    | 0.008                        | -0.35                                           | -3.32                                           |
| 40    | E20K     | 0.007                        | -0.31                                           | 3.83                                            |
| 41    | D25K     | 0.006                        | -0.26                                           | 1.21                                            |
| 42    | E201K    | 0.005                        | -0.31                                           | 4.88                                            |

|    |       |        |       |       |
|----|-------|--------|-------|-------|
| 43 | D89K  | 0.004  | -0.29 | -0.65 |
| 44 | D117K | 0.004  | -0.27 | -2.15 |
| 45 | D92K  | 0.002  | -0.24 | -2.81 |
| 46 | Q37K  | 0.000  | -0.22 | -0.59 |
| 47 | S147K | 0.000  | -0.23 | 2.98  |
| 48 | N156K | -0.002 | -0.21 | -3.52 |
| 49 | S41K  | -0.004 | -0.21 | -2.47 |
| 50 | A151K | -0.014 | -0.20 | -5.59 |

---

**Table S6** Predicted pK<sub>a</sub> drops and calculated free energy changes for charge redesign at active site in scaffold 3WZL

| Index | Mutation | pK <sub>a</sub> drop<br>of H242 | PRODA $\Delta\Delta G^{\text{bind}}$<br>(kcal/mol) | PRODA $\Delta\Delta G^{\text{fold}}$<br>(kcal/mol) |
|-------|----------|---------------------------------|----------------------------------------------------|----------------------------------------------------|
| 1     | D31H     | 0.474                           | -0.455                                             | 15.977                                             |
| 2     | F243H    | 0.297                           | -5.101                                             | 11.047                                             |
| 3     | V158H    | 0.265                           | -0.350                                             | 0.335                                              |
| 4     | F221H    | 0.220                           | 3.116                                              | -1.352                                             |
| 5     | M154H    | 0.201                           | -1.730                                             | 5.119                                              |
| 6     | V153H    | 0.179                           | 1.374                                              | -6.088                                             |
| 7     | C101H    | 0.110                           | -0.161                                             | 23.255                                             |
| 8     | M241H    | 0.090                           | -0.903                                             | 1.091                                              |



**Fig. S1** Lineweaver-Burk plots for determination of steady-state kinetic parameters of (A) the wild type ZHD101 and variants (B) M2, (C) M8, (D) M9.

**Fig. S1 (A)**

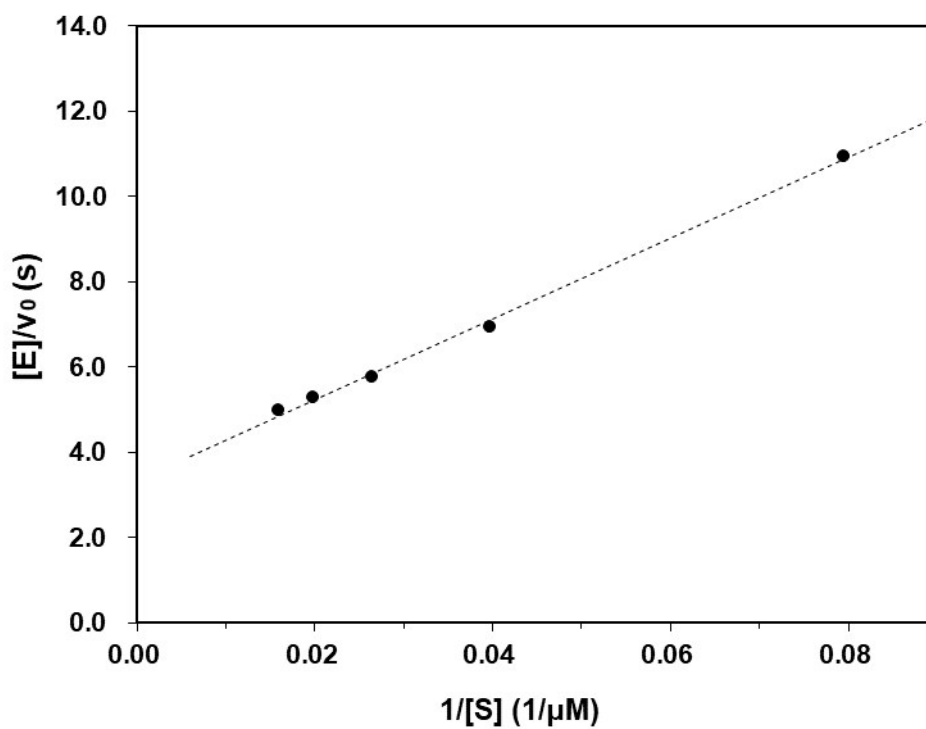

**Fig. S1 (B)**

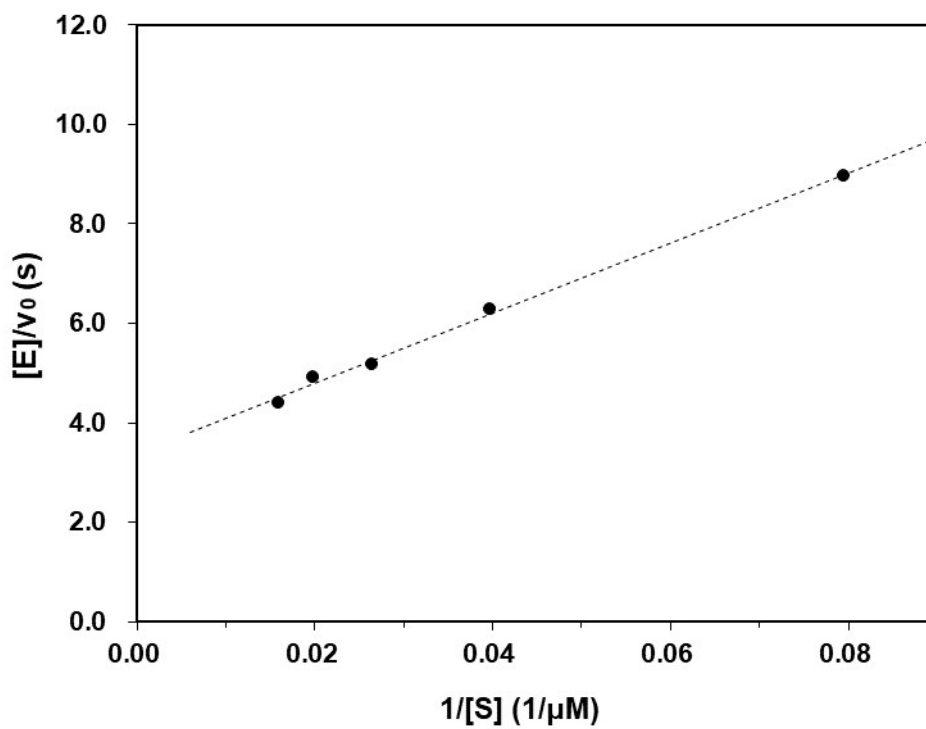

Fig. S1 (C)

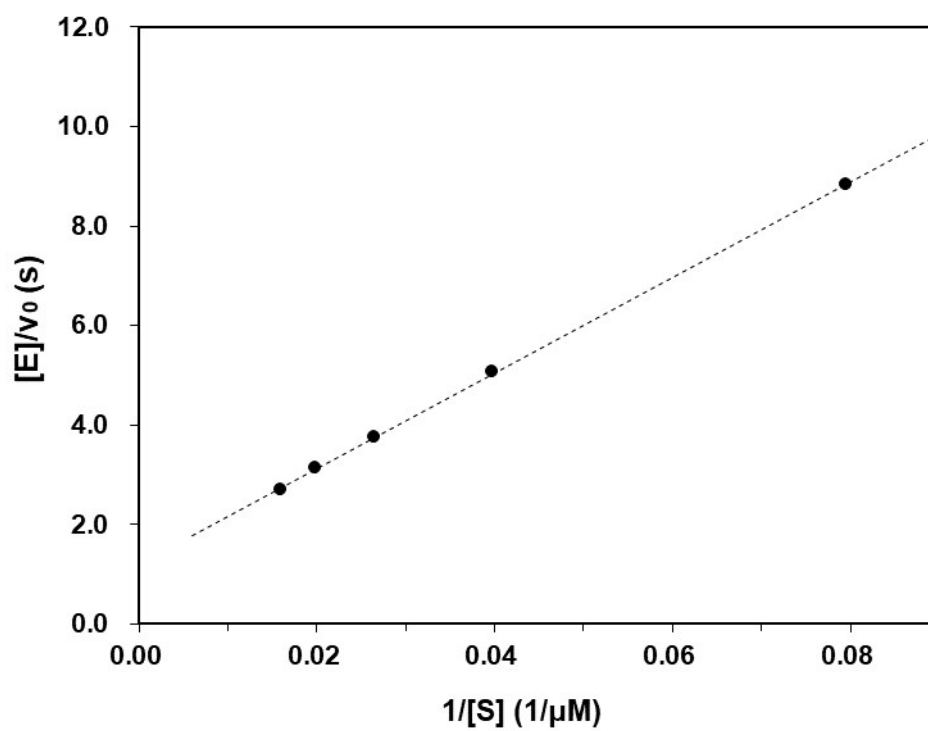

Fig. S1 (D)

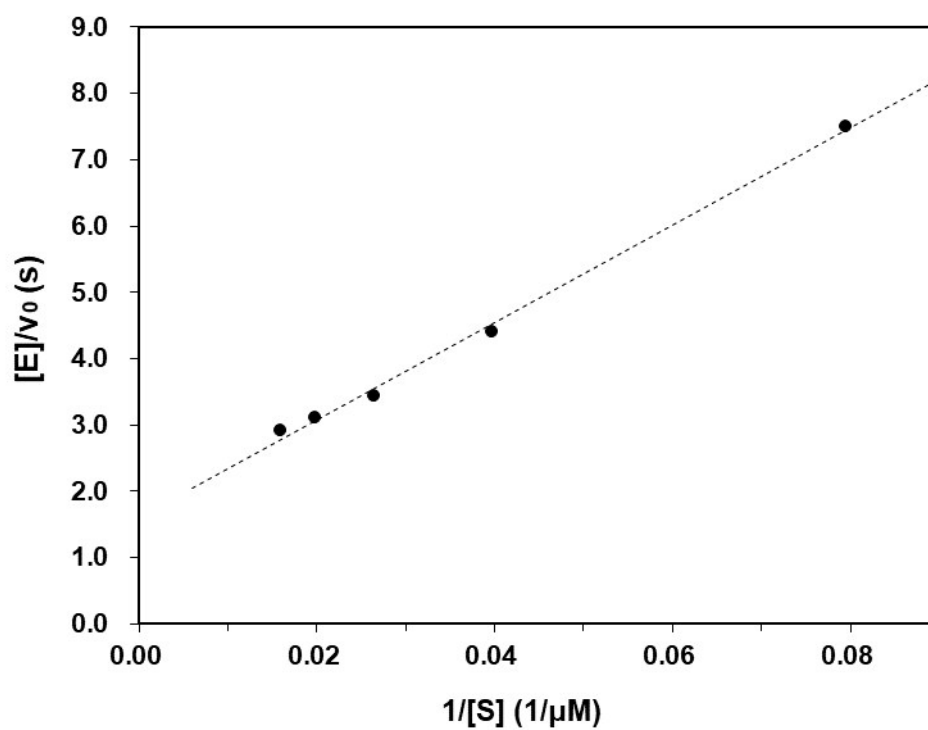

Supplement: c9ra04964a1.pdf [file c9ra04964a1.pdf]
